# Supplementary material
Source: publisher figshare collection journal article supplement (https://acs.figshare.com/ndownloader/files/15925304)
Supplement: Supplementary file 1 [file 15925304]

*Supporting Information for*

# **A Ratiometric Fluorescent DNA Radar Based on Contrary Response of DNA/Silver Nanoclusters and G-Quadruplex/Crystal Violet**

*Shuang Wang,<sup>†,‡</sup> Shasha Lu,<sup>†,‡</sup> Jiahui Zhao,<sup>†,§</sup> and Xiurong Yang<sup>\*,†,‡,§</sup>*

<sup>†</sup> State Key Laboratory of Electroanalytical Chemistry, Changchun Institute of Applied Chemistry, Chinese Academy of Sciences, Changchun, Jilin 130022, China

<sup>‡</sup> University of Science and Technology of China, Hefei, Anhui 230026, China

<sup>§</sup> University of Chinese Academy of Sciences, Beijing 100039, China

E-mail: xryang@ciac.ac.cn

| <b>Table S1.</b> All the sequences used in experiment. |                                                                                                  |
|--------------------------------------------------------|--------------------------------------------------------------------------------------------------|
| DNA sequences                                          | 5'-3'                                                                                            |
| Probe-0bp                                              | CCCCACCCACCCACCCATTGGGTAGGGTAGGGTTA<br>GGG                                                       |
| Probe-8bp                                              | CCCCACCCACCCACCCATT <u>TCAACATCGGG</u> TAGGGT<br>TAGGGTTAGGG                                     |
| Probe-15bp                                             | CCCCACCCACCCACCCAT <u>CAACATCAGTCTGAGG</u> TT<br>AGGGTTAGGGTTAGGG                                |
| Probe-22bp                                             | CCCCACCCACCCACCCATT <u>TCAACATCAGTCTGATAA</u><br><u>GCTAGGG</u> TTAGGGTTAGGGTTAGGG               |
| Probe-29bp                                             | CCCCACCCACCCACCCATT <u>TTTTTCAACATCAGTCTGA</u><br><u>TAAGCTATTTTGGG</u> TTAGGGTTAGGGTTAGGG       |
| Probe-36bp                                             | CCCCACCCACCCACCCATT <u>TTTTTTTTTCAACATCAGTC</u><br><u>TGATAAGCTATTTT</u> TTGGGTTAGGGTTAGGGTTAGGG |
| C <sub>8bp</sub>                                       | GATGTTGA                                                                                         |
| C <sub>15bp</sub>                                      | TCAGACTGATGTTGA                                                                                  |
| C <sub>22bp</sub>                                      | TAGCTTATCAGACTGATGTTGA                                                                           |
| C <sub>29bp</sub>                                      | AAAATAGCTTATCAGACTGATGTTGAAAA                                                                    |
| C <sub>36bp</sub>                                      | AAAAAATAGCTTATCAGACTGATGTTGAAAAAAA                                                               |
| Probe halfG4                                           | CCCCACCCACCCAT <u>CAACATCAGTCTGATAAGCTATGG</u><br>GTAGGG                                         |
| Probe nonG4                                            | CCCCACCCACCCAT <u>CAACATCAGTCTGATAAGCTA</u>                                                      |
| Probe 368                                              | CCCTTTAACCCTTCCCTCTGGTCAACCAGTCACAGGGT<br>TAGGGTTAGGGTTAGGG                                      |
| T                                                      | T GTG ACT GGT TGA CCA GAG GGG                                                                    |
| C1                                                     | TCAC AGT GAA CCG GTC TCT TTC                                                                     |
| C2                                                     | TCTCACACAGAAATCGCACCCGT                                                                          |
| C3                                                     | TAAGGTGCATCTAGTGCAGTTAG                                                                          |
| C4                                                     | TGTAAACATCCTTGACTGGAAG                                                                           |

|    |                         |
|----|-------------------------|
| C5 | TGAGATGAAGCACTGTAGCTC   |
| C6 | CAGCAGCAATTTCATGTTTTGAA |
| C7 | ATGCTTATCAGCTGATGTTGA   |

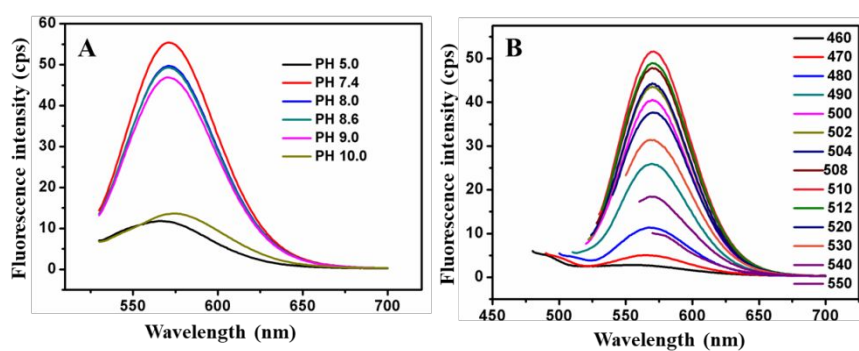

**Figure S1.** Fluorescence spectra of AgNCs under different pH values (A) and excitation wavelength (B).

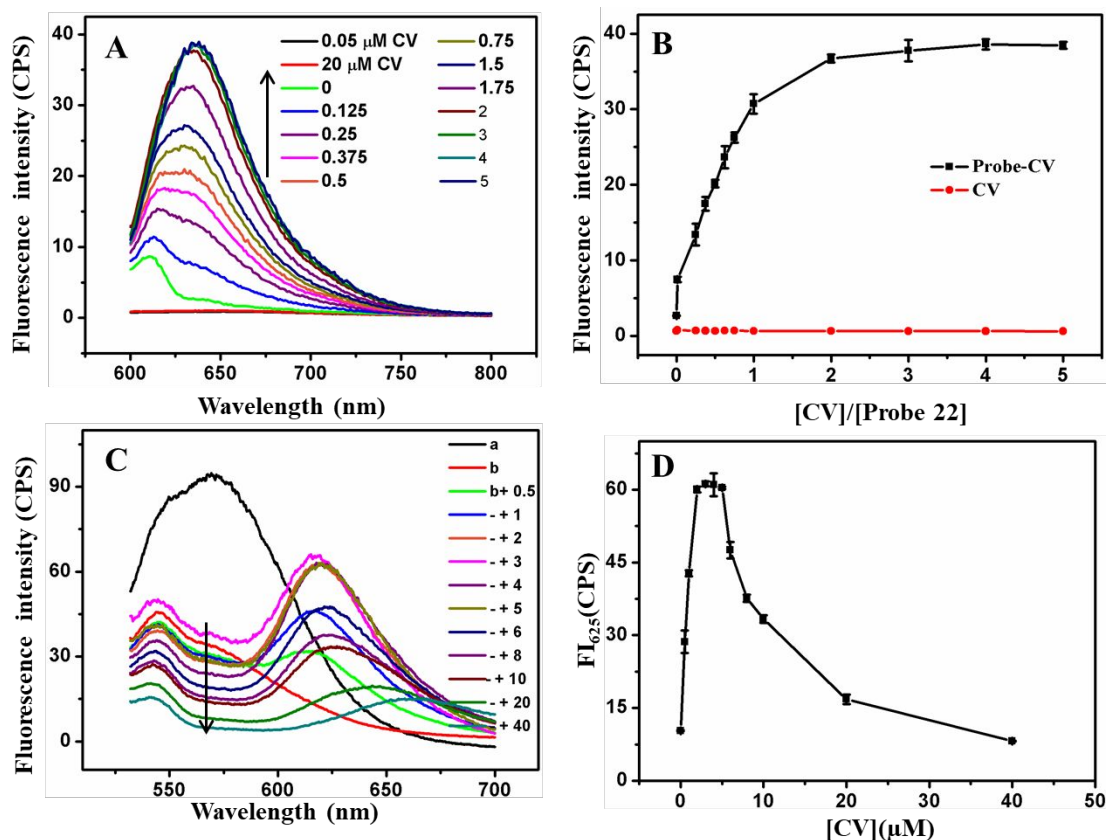

**Figure S2.** The effect of stoichiometry of CV/Probe-22 bp on the fluorescence intensity and optimization of CV concentration in ratiometric sensing system. The concentration of probe, Com was 1.5  $\mu\text{M}$ .

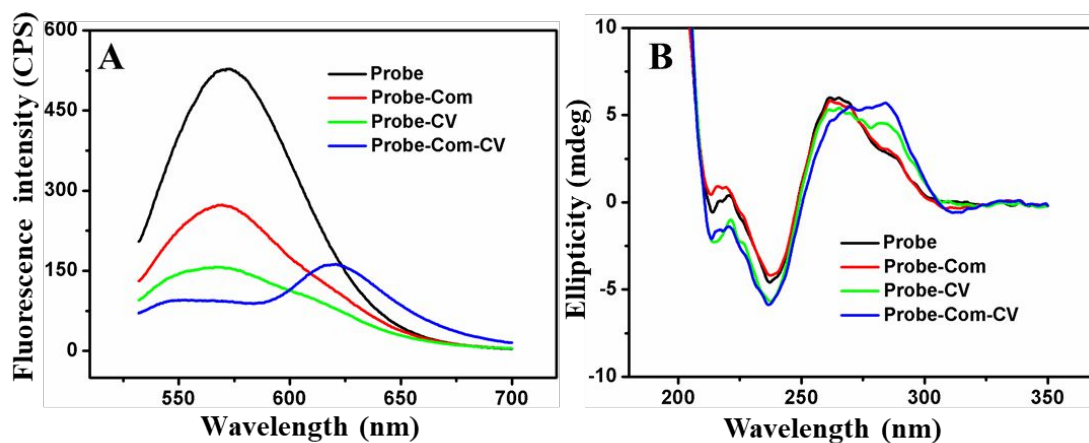

**Figure S3.** (A) Fluorescent and circular dichroism (B) spectra of probe, probe-Com, probe-CV, probe-Com-CV. The concentrations of probe, Com, CV were 5  $\mu\text{M}$ , 5  $\mu\text{M}$  and 50  $\mu\text{M}$ , respectively.

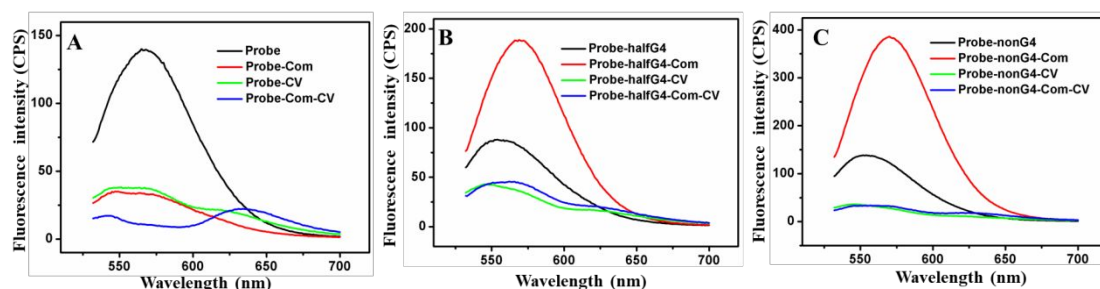

**Figure S4.** Fluorescence spectra of different control sequences (probe-22 bp (A), probe halfG4 (B), probe nonG4 (C)) in presence of complementary strand, CV, complementary strand and CV, respectively.

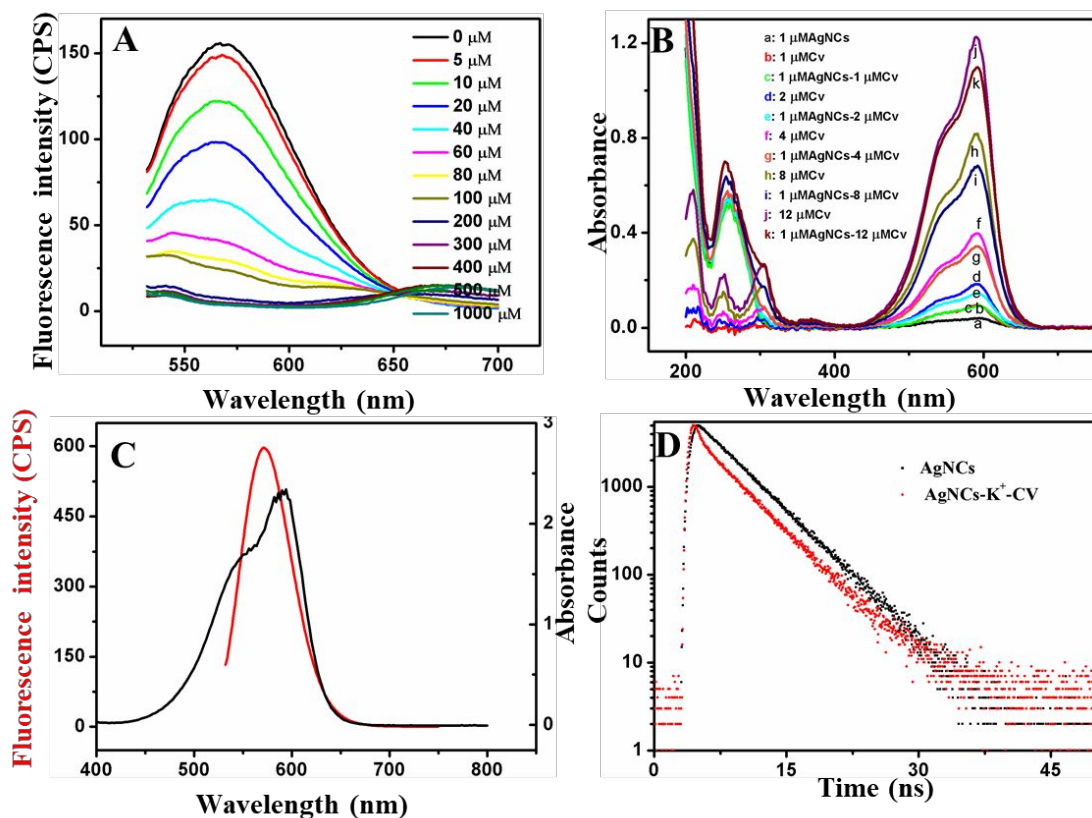

**Figure S5.** (A) Fluorescent spectra and (B) UV-vis absorption of AgNCs in different concentration of CV. (C) Spectral overlap between fluorescence emission (red line) of AgNCs ( $\lambda_{ex}=512$  nm) and absorbance spectra of CV (black line). (D) Fluorescent lifetime of AgNCs in absence and presence of CV.

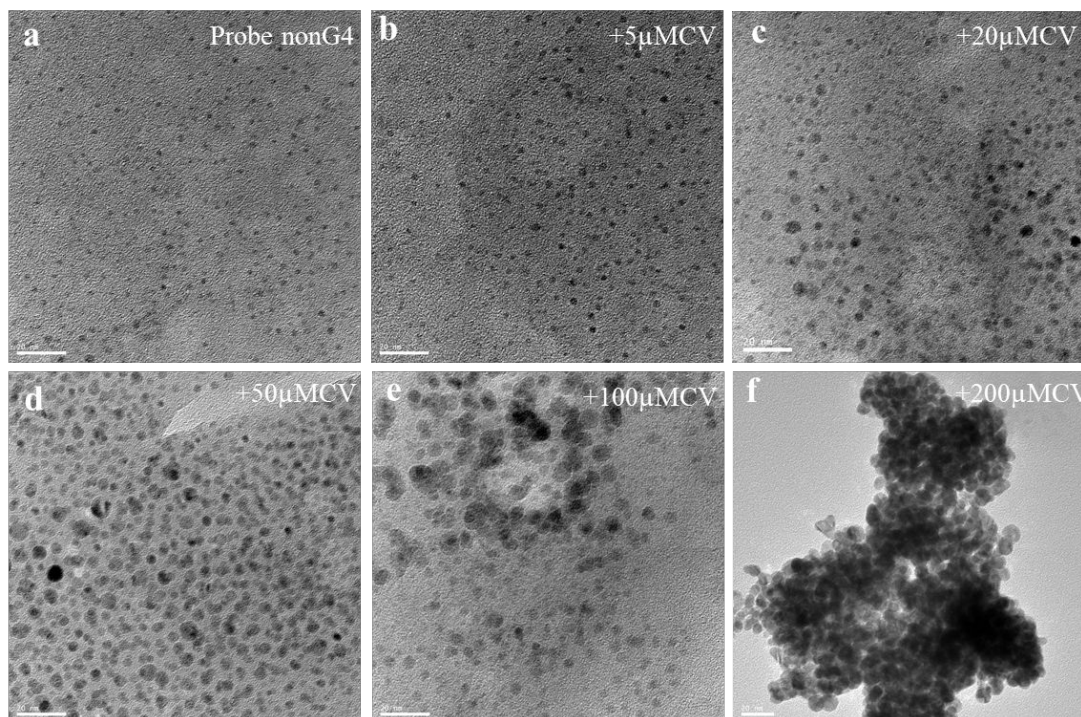

**Figure S6.** HR-TEM of AgNCs templated with Probe nonG4 in different concentration of CV. The concentration of DNA and gradient CV were 1.5, 5, 20, 50, 100, 200  $\mu\text{M}$ , respectively. All the bar represent 20 nm.

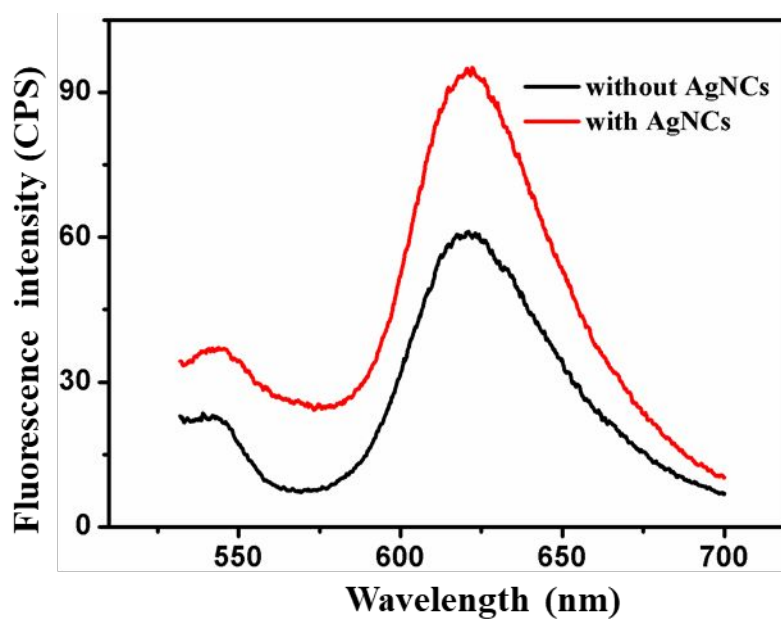

**Figure S7.** Fluorescence spectra of Probe<sub>T</sub> before and after preparing AgNCs. The concentrations of DNA template, its complementary and CV were 5  $\mu\text{M}$ , 5  $\mu\text{M}$ , and 10  $\mu\text{M}$ , respectively.



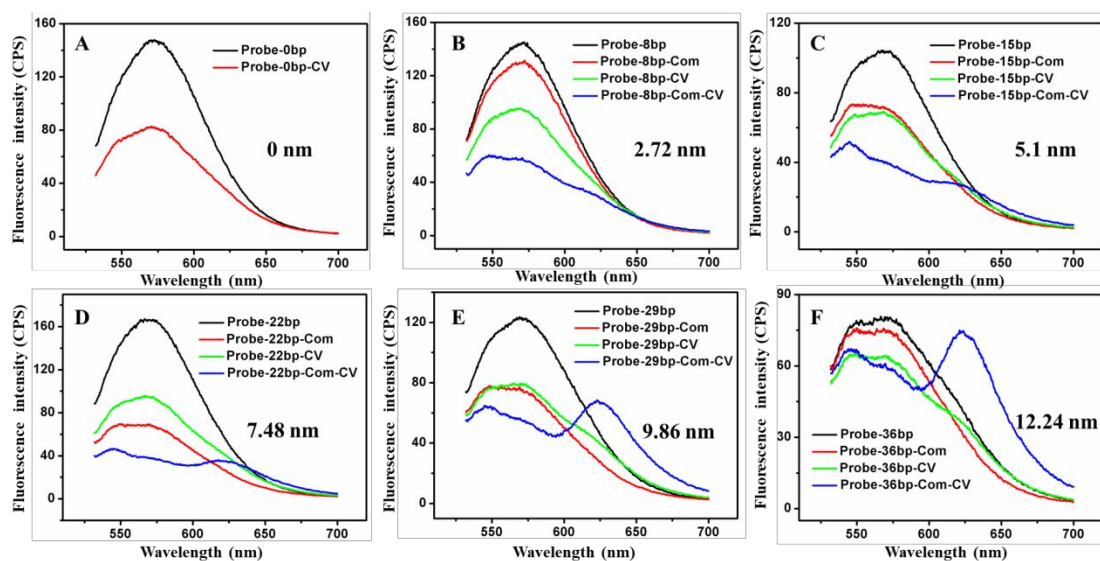

**Figure S8.** The relationship of sequence length with the fluorescence quenching and the appearance of a new emission. The concentration of DNA, Com, and CV were 1.5, 4, and 3  $\mu\text{M}$ , respectively.

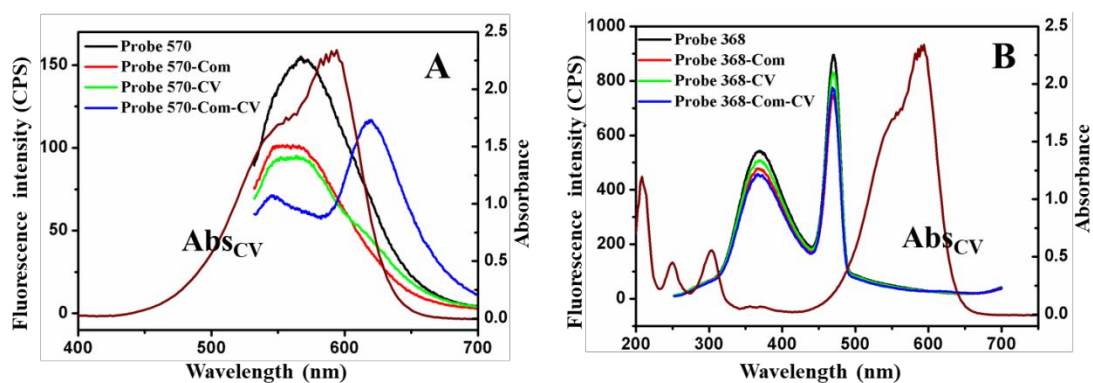

**Figure S9.** The effect of spectral overlap on the fluorescence quenching and the appearance of a new emission. The concentration of DNA, Com, and CV were 1.5, 4, and 3  $\mu\text{M}$ , respectively.

**Table S2.** Recovery Test Results of target DNA in 1% Human Serum Samples

| Samples | Spiked<br>( $\mu\text{M}$ ) | Found<br>( $\mu\text{M}$ ) | Recovery (%) | RSD<br>(n=3.%) |
|---------|-----------------------------|----------------------------|--------------|----------------|
| 1       | 0                           | -                          | -            | -              |
| 2       | 0.5                         | 0.569                      | 113.8        | 0.29           |
| 3       | 0.75                        | 0.798                      | 1.064        | 5.22           |
| 4       | 1                           | 0.950                      | 95           | 4.61           |
| 5       | 1.25                        | 1.240                      | 99.2         | 1.41           |
